# Supplementary material for: Sociodemographic and Health-Related Factors Influencing Drug Intake among the Elderly Population
Source: MDPI journal article supplement (doi:10.3390/ijerph19148766), 2022-07-19
Supplement: s1 [file s1]

**Table S2.** Characteristics of pharmacological treatment of the studied persons

| Feature (variable)                      | Number of medications currently taken |       |             |       |              |       |              |       | P-value |
|-----------------------------------------|---------------------------------------|-------|-------------|-------|--------------|-------|--------------|-------|---------|
|                                         | From 1 to 3                           |       | From 4 to 6 |       | From 7 to 10 |       | More than 10 |       |         |
|                                         | N = 301                               |       | N = 151     |       | N = 40       |       | N = 8        |       |         |
|                                         | n                                     | %     | n           | %     | n            | %     | n            | %     |         |
| Gender                                  |                                       |       |             |       |              |       |              |       | 0.178   |
| Women                                   | 182                                   | 60,5% | 87          | 57,6% | 18           | 45,0% | 3            | 37,5% |         |
| Men                                     | 119                                   | 39,5% | 64          | 42,4% | 22           | 55,0% | 5            | 62,5% |         |
| Age (years)                             |                                       |       |             |       |              |       |              |       | 0.881   |
| 60 – 64                                 | 85                                    | 28,2% | 41          | 27,2% | 13           | 32,5% | 2            | 25,0% |         |
| 65 - 69                                 | 77                                    | 25,6% | 38          | 25,2% | 12           | 30,0% | 1            | 12,5% |         |
| 70 and more                             | 139                                   | 46,2% | 72          | 47,7% | 15           | 37,5% | 5            | 62,5% |         |
| Domicile                                |                                       |       |             |       |              |       |              |       | 0.318   |
| Village                                 | 68                                    | 22,6% | 31          | 20,5% | 8            | 20,0% | 3            | 37,5% |         |
| City up to 20,000 inhabitants           | 37                                    | 12,3% | 14          | 9,3%  | 3            | 7,5%  | 2            | 25,0% |         |
| A city with 20,000 to 100,000           | 83                                    | 27,6% | 44          | 29,1% | 6            | 15,0% | 3            | 37,5% |         |
| A city with 100,000 to 200,000          | 33                                    | 11,0% | 23          | 15,2% | 6            | 15,0% | 0            | 0,0%  |         |
| A city with 200,000 to 400,000          | 25                                    | 8,3%  | 8           | 5,3%  | 6            | 15,0% | 0            | 0,0%  |         |
| A city with over 400,000 inhab.         | 55                                    | 18,3% | 31          | 20,5% | 11           | 27,5% | 0            | 0,0%  |         |
| Household size                          |                                       |       |             |       |              |       |              |       | 0.367   |
| I live alone                            | 69                                    | 22,9% | 31          | 20,5% | 6            | 15,0% | 2            | 25,0% |         |
| I live with my partner                  | 110                                   | 36,5% | 69          | 45,7% | 19           | 47,5% | 4            | 50,0% |         |
| I live with my partner and our children | 80                                    | 26,6% | 28          | 18,5% | 7            | 17,5% | 2            | 25,0% |         |
| I live alone with my children           | 22                                    | 7,3%  | 11          | 7,3%  | 2            | 5,0%  | 0            | 0,0%  |         |
| I live with a family                    | 14                                    | 4,7%  | 9           | 6,0%  | 6            | 15,0% | 0            | 0,0%  |         |
| A different situation                   | 6                                     | 2,0%  | 3           | 2,0%  | 0            | 0,0%  | 0            | 0,0%  |         |
| Education                               |                                       |       |             |       |              |       |              |       | 0.713   |
| Basic                                   | 4                                     | 1,3%  | 3           | 2,0%  | 1            | 2,5%  | 0            | 0,0%  |         |
| Vocational                              | 58                                    | 19,3% | 36          | 23,8% | 9            | 22,5% | 2            | 25,0% |         |
| Secondary                               | 154                                   | 51,2% | 64          | 42,4% | 22           | 55,0% | 5            | 62,5% |         |
| Higher                                  | 85                                    | 28,2% | 48          | 31,8% | 8            | 20,0% | 1            | 12,5% |         |
| Net income per person                   |                                       |       |             |       |              |       |              |       | 0.438   |
| < 1000 PLN                              | 16                                    | 5,3%  | 11          | 7,3%  | 2            | 5,0%  | 0            | 0,0%  |         |
| 1001 – 2000 PLN                         | 123                                   | 40,9% | 43          | 28,5% | 18           | 45,0% | 4            | 50,0% |         |
| 2001 – 3000 PLN                         | 88                                    | 29,2% | 55          | 36,4% | 14           | 35,0% | 1            | 12,5% |         |
| Above 3000 PLN                          | 63                                    | 20,9% | 38          | 25,2% | 6            | 15,0% | 3            | 37,5% |         |
| Refusal                                 | 11                                    | 3,7%  | 4           | 2,6%  | 0            | 0,0%  | 0            | 0,0%  |         |
| Body weight (kg)                        |                                       |       |             |       |              |       |              |       | <0.001  |
| Me (Q1-Q3)                              | 73 (65-84)                            |       | 80 (72-90)  |       | 80 (73-91)   |       | 102 (80-125) |       |         |
| Min - Max                               | 48 - 125                              |       | 56 - 125    |       | 51 - 140     |       | 60 - 140     |       |         |
| Mass ≥ 73 kg                            | 152                                   | 50,5% | 112         | 74,2% | 31           | 77,5% | 7            | 87,5% | <0.001  |
| BMI (kg/m <sup>2</sup> )                |                                       |       |             |       |              |       |              |       |         |
| Me (IQR)                                | 26 (24-28)                            |       | 29 (26-31)  |       | 28 (25-32)   |       | 34 (29-40)   |       |         |
| Min - Max                               | 19 - 39                               |       | 21 - 42     |       | 20 - 46      |       | 21 – 43      |       |         |
| BMI ≥ 25,86 kg/m <sup>2</sup>           | 146                                   | 48,5% | 117         | 77,5% | 28           | 70,0% | 7            | 87,5% | <0.001  |
| Number of doctors prescribing drugs     |                                       |       |             |       |              |       |              |       | <0.001  |
| 1 doctor                                | 252                                   | 71,6% | 83          | 23,6% | 14           | 4,0%  | 3            | 0,9%  |         |
| 2 doctors or more                       | 49                                    | 33,1% | 68          | 46%   | 26           | 17,6% | 5            | 3,4%  |         |
