# Supplementary material for: Sociodemographic and Health-Related Factors Influencing Drug Intake among the Elderly Population
Source: MDPI journal article supplement (doi:10.3390/ijerph19148766), 2022-07-19
Supplement: s1 [file s1]

**Table S3.** Mental characteristics of the respondents in groups differing in the number of medications taken

| Feature (variable)                                            | Number of medications currently taken |                        |                        |                       | P-value          |
|---------------------------------------------------------------|---------------------------------------|------------------------|------------------------|-----------------------|------------------|
|                                                               | From 1 to 3<br>N = 301                | From 4 to 6<br>N = 151 | From 7 to 10<br>N = 40 | More than 10<br>N = 8 |                  |
| Assessment of basic activities of daily living (ADL scale)    |                                       |                        |                        |                       | <b>0.017</b>     |
| M ± SD                                                        | 5.9 ± 0.4                             | 5.9 ± 0.3              | 5.8 ± 0.5              | 5.5 ± 0.8             |                  |
| Me (IQR)                                                      | 6 (6-6)                               | 6 (6-6)                | 6 (6-6)                | 6 (5-6)               |                  |
| Min - Max                                                     | 2 - 6                                 | 4 - 6                  | 4 - 6                  | 4 - 6                 |                  |
| ADL < 5 pts                                                   | 3 1.0%                                | 2 1.3%                 | 1 2.5%                 | 1 12.5%               | <b>0.049</b>     |
| Assessment of Complex Daily Life Activities (IADL scale)      |                                       |                        |                        |                       | <b>&lt;0.001</b> |
| M ± SD                                                        | 23.3 ± 1.8                            | 22.6 ± 2.6             | 22.4 ± 2.9             | 19.5 ± 4.4            |                  |
| Me (IQR)                                                      | 24 (24-24)                            | 24 (22-24)             | 24 (22-24)             | 20 (16-24)            |                  |
| Min - Max                                                     | 13 - 24                               | 11 - 24                | 12 - 24                | 14 - 24               |                  |
| IADL < 24 pts                                                 | 64 21.3%                              | 54 35.8%               | 16 40.0%               | 5 62.5%               | <b>&lt;0.001</b> |
| Mental performance assessment (AMTS scale)                    |                                       |                        |                        |                       | 0.273            |
| M ± SD                                                        | 9.2 ± 1.0                             | 9.1 ± 0.9              | 9.0 ± 0.9              | 8.8 ± 1.5             |                  |
| Me (IQR)                                                      | 9 (9-10)                              | 9 (9-10)               | 9 (8-10)               | 9 (8-10)              |                  |
| Min - Max                                                     | 5 - 10                                | 6 - 10                 | 7 - 10                 | 6 - 10                |                  |
| Assessment of depression in the elderly (GDS-15 scale)        |                                       |                        |                        |                       | <b>&lt;0.001</b> |
| M ± SD                                                        | 4.2 ± 3.6                             | 5.4 ± 4.1              | 6.5 ± 4.2              | 8.4 ± 5.1             |                  |
| Me (IQR)                                                      | 3 (1-6)                               | 5 (2-9)                | 6 (3-11)               | 10 (5-13)             |                  |
| Min - Max                                                     | 0 - 14                                | 0 - 15                 | 0 - 13                 | 0 - 13                |                  |
| GDS-15 > 5 pts                                                | 88 29.2%                              | 61 40.4%               | 21 52.5%               | 6 75.0%               | <b>0.001</b>     |
| Assessment of anxiety in the elderly on the GAS-10 scale      |                                       |                        |                        |                       | <b>&lt;0.001</b> |
| M ± SD                                                        | 6.6 ± 4.4                             | 7.8 ± 4.5              | 9.1 ± 5.2              | 10.9 ± 6.6            |                  |
| Me (IQR)                                                      | 6 (3-9)                               | 7 (4-10)               | 9 (5-13)               | 12 (5-17)             |                  |
| Min - Max                                                     | 0 - 25                                | 0 - 22                 | 2 - 23                 | 2 - 19                |                  |
| GAS > 7 pts (anxiety)                                         | 100 33,2%                             | 72 47,7%               | 23 57,5%               | 6 75,0%               | <b>&lt;0.001</b> |
| Assessment of social isolation of older people (LSNS-6 scale) |                                       |                        |                        |                       | <b>0.048</b>     |
| M ± SD                                                        | 14.3 ± 6.0                            | 14.2 ± 5.9             | 14.2 ± 5.3             | 9.0 ± 2.9             |                  |
| Me (IQR)                                                      | 15 (10-18)                            | 14 (10-18)             | 15 (11-17)             | 10 (8-11)             |                  |
| Min - Max                                                     | 0 - 30                                | 0 - 30                 | 5 - 26                 | 3 - 13                |                  |
| LSND < 15 pts                                                 | 144 47.8%                             | 78 51.7%               | 19 47.5%               | 8 100.0%              | <b>0.032</b>     |
| Assessment of loneliness on the Gierveld scale                |                                       |                        |                        |                       | 0.514            |
| M ± SD                                                        | 13.2 ± 1.8                            | 13.1 ± 1.8             | 12.8 ± 1.6             | 13.8 ± 2.6            |                  |
| Me (IQR)                                                      | 13 (12-14)                            | 13 (12-14)             | 13 (12-14)             | 14 (13-15)            |                  |
| Min - Max                                                     | 8 - 18                                | 6 - 17                 | 8 - 15                 | 9 - 18                |                  |
| Nutritional Assessment (MNA scale)                            |                                       |                        |                        |                       | <b>0.005</b>     |
| M ± SD                                                        | 13.0 ± 1.2                            | 12.5 ± 1.8             | 12.2 ± 1.7             | 11.8 ± 2.1            |                  |
| Me (IQR)                                                      | 13 (12-14)                            | 13 (12-14)             | 12 (11-14)             | 12 (11-14)            |                  |
| Min - Max                                                     | 8 - 14                                | 6 - 14                 | 6 - 14                 | 8 - 14                |                  |
| MNA < 12 pts                                                  | 36 12,0%                              | 32 21,2%               | 11 27,5%               | 3 37,5%               | <b>0.005</b>     |
