# Supplementary material for: Sociodemographic and Health-Related Factors Influencing Drug Intake among the Elderly Population
Source: MDPI journal article supplement (doi:10.3390/ijerph19148766), 2022-07-19
Supplement: s1 [file s1]

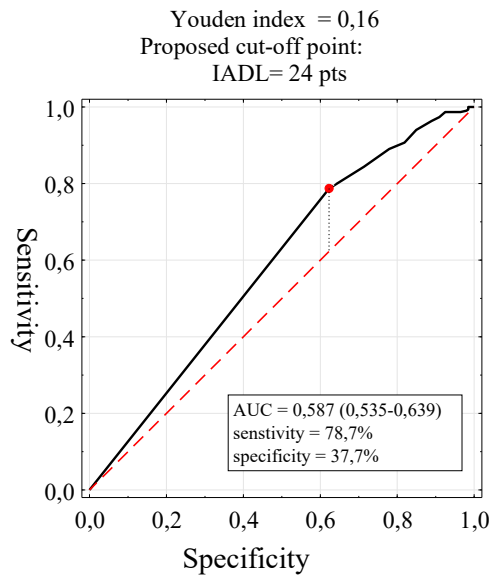

(A)

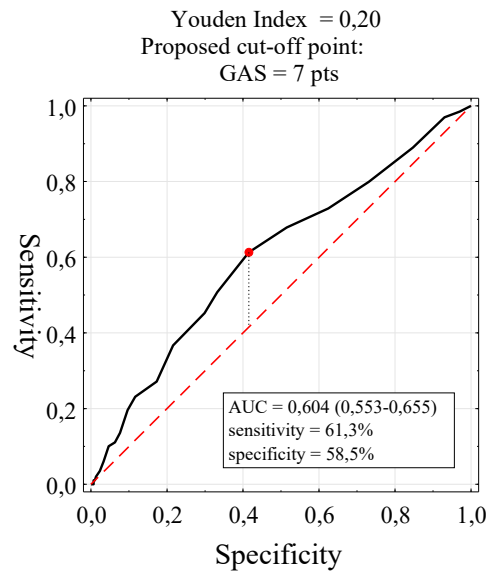

(B)

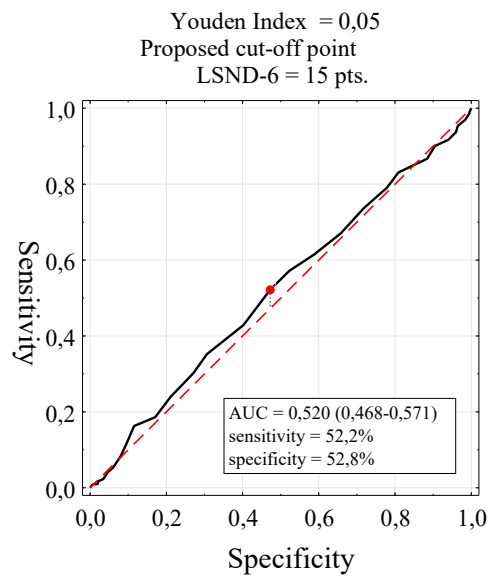

(C)

**Figure S1.** ROC curves and threshold values for (A)the assessment of complex daily life activities (IADL), (B)the assessment of anxiety in the elderly (GAS-10) and (c) the assessment of social isolation of the elderly (LSNS-6).
