# Supplementary material for: Sociodemographic and Health-Related Factors Influencing Drug Intake among the Elderly Population
Source: MDPI journal article supplement (doi:10.3390/ijerph19148766), 2022-07-19
Supplement: s1 [file s1]

**Table S4. Match relevance table**

|            | Predicted 1 | Predicted 0 | Correct |
|------------|-------------|-------------|---------|
| Observed 1 | 113         | 86          | 56.8%   |
| Observed 0 | 39          | 262         | 87.0%   |

Odds ratio = 8.83 (5.70-13.7). Percentage of correct classifications = 75.0%
