# Supplementary material for: Sociodemographic and Health-Related Factors Influencing Drug Intake among the Elderly Population
Source: MDPI journal article supplement (doi:10.3390/ijerph19148766), 2022-07-19
Supplement: s1 [file s1]

**Table S5.** Linear correlation coefficients between drug groups and socio-demographic, clinical and mental characteristics

| Feature (variable)                      | Group of drugs |        |        |        |        |        |        |        |
|-----------------------------------------|----------------|--------|--------|--------|--------|--------|--------|--------|
|                                         | A              | B      | C      | D      | E      | F      | G      | H      |
| Female                                  | -0.024         | -0.007 | -0.036 | 0.046  | 0.092  | -0.112 | -0.025 | 0.022  |
| Age group                               | 0.001          | -0.009 | 0.026  | -0.054 | -0.030 | -0.035 | -0.053 | -0.112 |
| Domicile                                | -0.054         | -0.027 | -0.035 | -0.060 | -0.004 | -0.015 | 0.091  | -0.036 |
| Household                               | 0.018          | 0.017  | 0.049  | 0.014  | 0.062  | 0.107  | 0.087  | 0.017  |
| Education                               | -0.040         | -0.004 | 0.005  | -0.149 | -0.107 | -0.040 | -0.054 | -0.011 |
| Net income                              | 0.015          | -0.010 | 0.019  | -0.119 | -0.088 | -0.052 | -0.072 | 0.013  |
| Body weight                             | 0.123          | 0.232  | 0.122  | 0.051  | -0.013 | 0.189  | 0.020  | -0.078 |
| Body Mass Index                         | 0.162          | 0.293  | 0.125  | 0.112  | 0.043  | 0.152  | 0.029  | -0.092 |
| Activities of Daily Living              | -0.086         | -0.061 | 0.017  | -0.050 | -0.041 | -0.023 | -0.025 | 0.039  |
| Instrumental Activities of Daily Living | -0.165         | -0.105 | -0.143 | -0.123 | -0.036 | -0.067 | -0.072 | -0.025 |
| Abbreviated mental test score           | 0.002          | -0.108 | -0.038 | -0.042 | -0.021 | -0.060 | 0.014  | 0.081  |
| Geriatric Depression Scale              | 0.157          | 0.104  | 0.063  | 0.194  | 0.156  | 0.060  | 0.264  | -0.026 |
| Geriatric Anxiety Scale                 | 0.195          | 0.091  | 0.077  | 0.243  | 0.089  | 0.076  | 0.249  | 0.060  |
| Lubben Social Network Scale             | 0.041          | -0.012 | -0.013 | -0.094 | -0.011 | 0.063  | -0.077 | -0.070 |
| DeJong Gierveld Loneliness Scale        | -0.077         | -0.014 | -0.037 | -0.175 | -0.076 | -0.036 | -0.100 | -0.080 |
| Mini Nutritional Assessment             | -0.132         | -0.021 | -0.135 | -0.117 | -0.084 | -0.046 | -0.284 | -0.039 |
| Coronary artery disease                 | 0.511          | 0.264  | 0.235  | -0.012 | 0.020  | 0.287  | -0.030 | -0.035 |
| Diabetes                                | 0.095          | 0.228  | 0.131  | -0.034 | 0.046  | 0.076  | 0.085  | 0.018  |
| Asthma                                  | 0.108          | 0.072  | 0.084  | 0.089  | 0.077  | -0.009 | -0.014 | 0.123  |
| Chronic obstructive pulmonary disease   | 0.170          | 0.116  | 0.086  | 0.062  | -0.012 | 0.175  | -0.048 | -0.041 |
| Heart failure                           | 0.562          | 0.250  | 0.157  | 0.015  | -0.021 | 0.342  | 0.015  | -0.049 |
| Kidney failure                          | 0.017          | 0.118  | 0.081  | 0.037  | -0.029 | 0.041  | -0.032 | 0.061  |
| Gastroesophageal reflux disease         | 0.093          | 0.039  | 0.183  | 0.067  | 0.268  | 0.141  | 0.103  | -0.025 |

A - cardiac drugs, B - hypertension medications, C – diuretics, D – painkillers, E - medicines for food ailments, F – anticoagulants, G – antidepressants, H - drugs to improve memory. Correlation coefficients significant at the level of  $p < 0.05$  were marked
