# Supplementary material for: Sociodemographic and Health-Related Factors Influencing Drug Intake among the Elderly Population
Source: MDPI journal article supplement (doi:10.3390/ijerph19148766), 2022-07-19
Supplement: s1 [file s1]

**Table S1.** Characteristics of the mental traits of the respondents

| Feature (variable)                                            | Statistics     |
|---------------------------------------------------------------|----------------|
| Assessment of basic activities of daily living (ADL scale)    |                |
| M $\pm$ SD                                                    | 5.9 $\pm$ 0.4  |
| Me (IQR)                                                      | 6 (6-6)        |
| Min - Max                                                     | 2 - 6          |
| Fit people (5 - 6 points)                                     | 493 (98.6%)    |
| Moderately disabled people (3 - 4 points)                     | 6 (1.2%)       |
| Disabled people (0 – 2 points)                                | 1 (0.2%)       |
| Assessment of Complex Daily Life Activities (IADL scale)      |                |
| M $\pm$ SD                                                    | 22.9 $\pm$ 2.3 |
| Me (IQR)                                                      | 24 (23-24)     |
| Min - Max                                                     | 11 - 24        |
| Mental performance assessment (AMTS scale)                    |                |
| M $\pm$ SD                                                    | 9.1 $\pm$ 1.0  |
| Me (IQR)                                                      | 9 (9-10)       |
| Min - Max                                                     | 5 - 10         |
| Normal condition (7 - 10 points)                              | 9.1 $\pm$ 1.0  |
| Moderate disturbances (4 - 6 points)                          | 9 (9-10)       |
| Assessment of depression in the elderly (GDS-15 scale)        |                |
| M $\pm$ SD                                                    | 4.8 $\pm$ 4.0  |
| Me (IQR)                                                      | 4 (2-8)        |
| Min - Max                                                     | 0 - 15         |
| No depression (0 - 5 points)                                  | 324 (64.8%)    |
| Depression (6 - 15 points)                                    | 176 (35.2%)    |
| Assessment of anxiety in the elderly on the GAS-10 scale      |                |
| M $\pm$ SD                                                    | 7.2 $\pm$ 4.6  |
| Me (IQR)                                                      | 6 (4-10)       |
| Min - Max                                                     | 0 - 25         |
| Assessment of social isolation of older people (LSNS-6 scale) |                |
| M $\pm$ SD                                                    | 14.2 $\pm$ 5.9 |
| Me (IQR)                                                      | 15 (10-18)     |
| Min - Max                                                     | 0 - 30         |
| Assessment of loneliness on the Gierveld scale                |                |
| M $\pm$ SD                                                    | 13.1 $\pm$ 1.8 |
| Me (IQR)                                                      | 13 (12-14)     |
| Min - Max                                                     | 6 - 18         |
| Nutritional Assessment (MNA scale)                            |                |
| M $\pm$ SD                                                    | 12.8 $\pm$ 1.5 |
| Me (IQR)                                                      | 13 (12-14)     |
| Min - Max                                                     | 6 - 14         |
| Proper nutritional status (12 - 14 points)                    | 418 (83.6%)    |
| Threat of malnutrition (8 - 11 points)                        | 78 (15.6%)     |
| Malnutrition (0 - 7 points)                                   | 4 (0.8%)       |
