# Supplementary material for: Sociodemographic and Health-Related Factors Influencing Drug Intake among the Elderly Population
Source: Int J Environ Res Public Health. 2022 Jul 19;19(14):8766. doi: 10.3390/ijerph19148766 (PMC9325201; doi:10.3390/ijerph19148766)
Supplement: Supplementary file 1 [file ijerph-19-08766-s001.zip]

Archive with 7 entries (7 files):
- Figure S1 (R2).pdf
- Figure S2 (R2).pdf
- Table S1 (R2).pdf
- Table S2 (R2).pdf
- Table S3 (R2).pdf
- Table S4 (R2).pdf
- Table S5 (R2).pdf
